# Supplementary material
Source: PubMed Central journal article supplement (PMC3208120)
Supplement: NIHMS309568-supplement-01.pdf [file NIHMS309568-supplement-01.pdf]

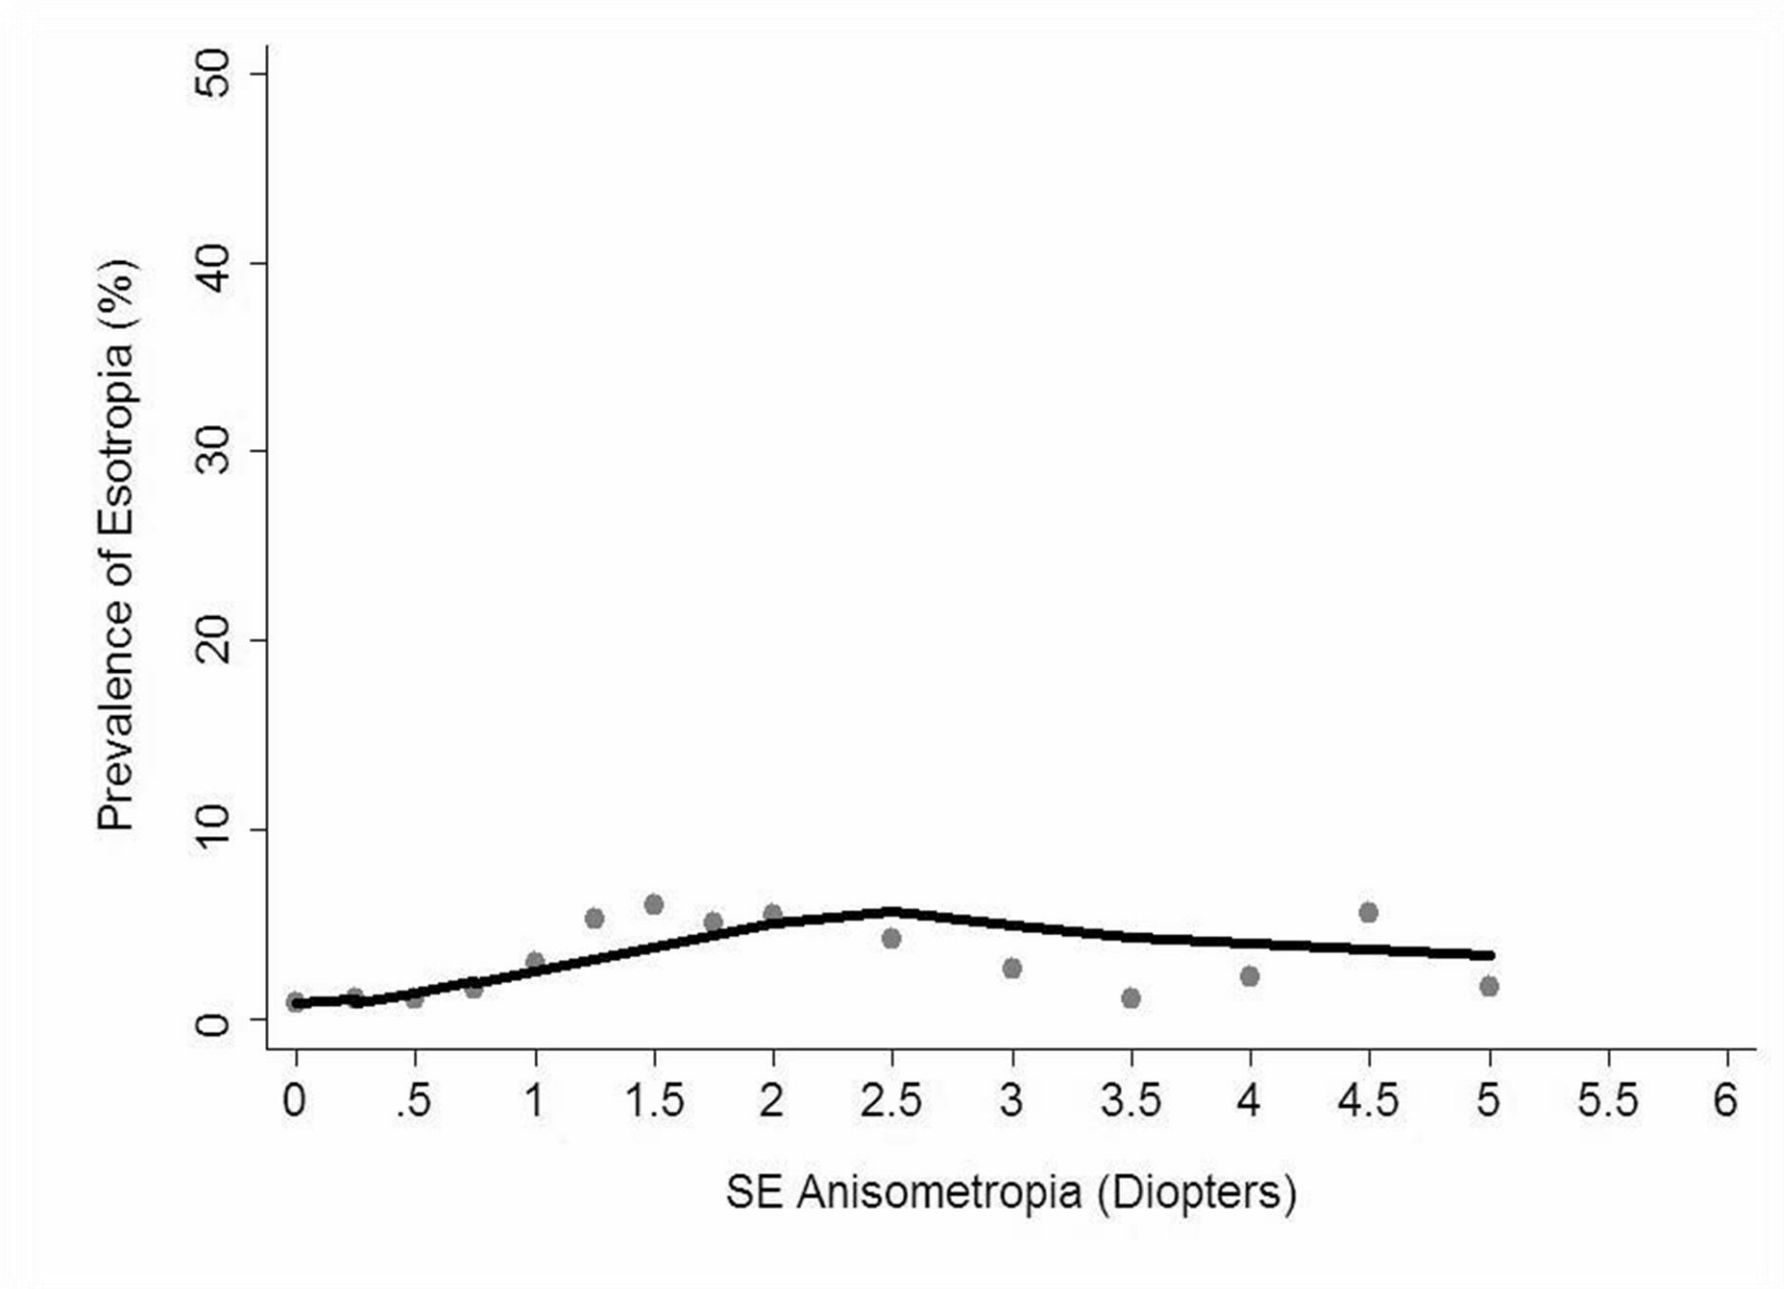

**Figure 3:** Locally weighted scatter plot smoothing (LOWESS) plot illustrating the independent relationship between magnitude of spherical equivalent (SE) anisometropia and the prevalence of esotropia in 6- to 72-month-old children in the Multi-Ethnic and the Baltimore Pediatric Eye Disease Studies (MEPEDS and BPEDS), after controlling for other risk factors.
