# Supplementary material
Source: PubMed Central journal article supplement (PMC3208120)
Supplement: NIHMS309568-supplement-02.pdf [file NIHMS309568-supplement-02.pdf]

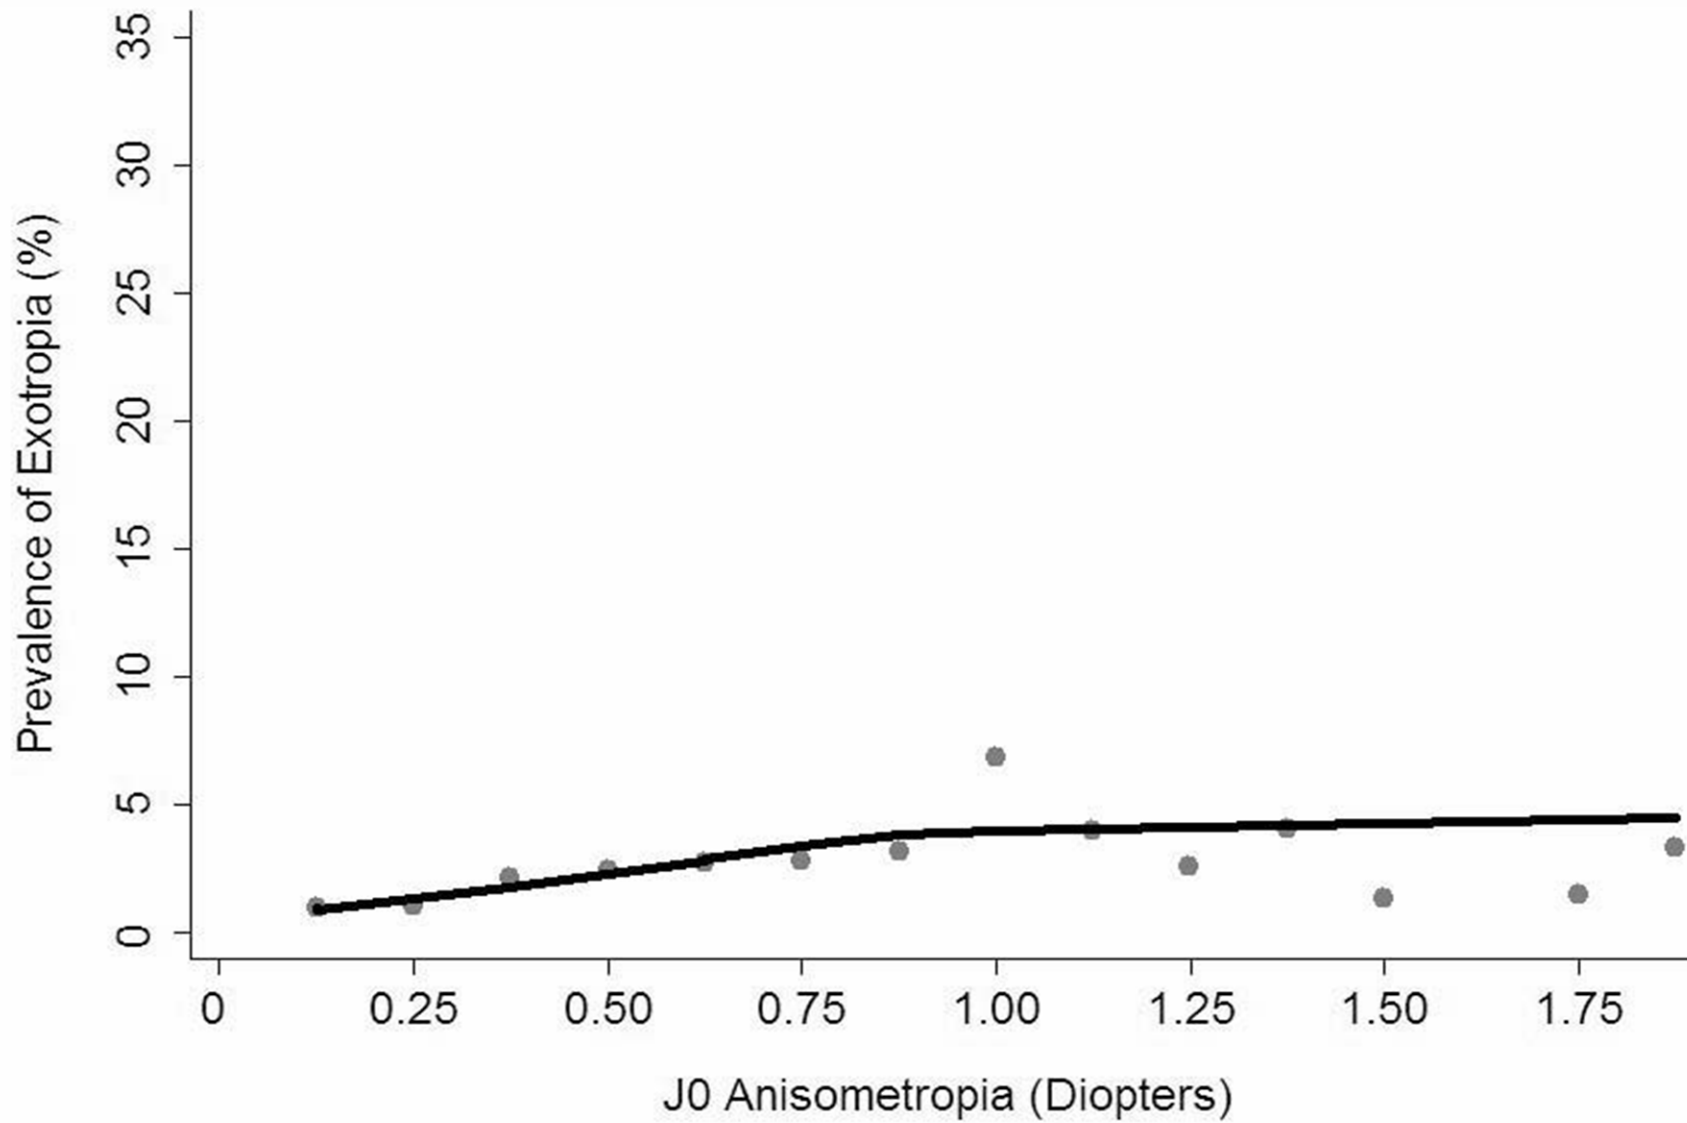

**Figure 6:** Locally weighted scatter plot smoothing (LOWESS) plot illustrating the independent relationship between magnitude of J0 anisometropia and the prevalence of exotropia in 6- to 72-month-old children in the Multi-Ethnic and the Baltimore Pediatric Eye Disease Studies (MEPEDS and BPEDS), after controlling for other risk factors.
